# Supplementary material
Source: PubMed Central journal article supplement (PMC4420181)
Supplement: chest_147_5_1282_ds01.pdf [file chest_147_5_1282_ds01.pdf]

# Therapeutic Bronchoscopy for Malignant Central Airway Obstruction

## Success Rates and Impact on Dyspnea and Quality of Life

*David E. Ost, MD, MPH, FCCP; Armin Ernst, MD, MHCM, FCCP; Horiana B. Grosu, MD; Xiudong Lei, PhD; Javier Diaz-Mendoza, MD; Mark Slade, MBBS, FCCP; Thomas R. Gildea, MD, FCCP; Michael S. Machuzak, MD, FCCP; Carlos A. Jimenez, MD, FCCP; Jennifer Toth, MD; Kevin L. Kovitz, MD, FCCP; Cynthia Ray, MD, FCCP; Sara Greenhill, MD, FCCP; Roberto F. Casal, MD; Francisco A. Almeida, MD, FCCP; Momen M. Wahidi, MD, FCCP; George A. Eapen, MD, FCCP; David Feller-Kopman, MD, FCCP; Rodolfo C. Morice, MD, FCCP; Sadia Benzaquen, MD; Alain Tremblay, MDCM, FCCP; and Michael Simoff, MD, FCCP; on behalf of the AQUIRE Bronchoscopy Registry*

CHEST 2015; 147(5):1282-1298

### **e-Appendix 1.**

#### **Methods and Results:**

##### Anatomic and Therapeutic Variable Definitions

Patients could have multiple sites of airway obstruction and multiple types of interventions could be used either at the same site or at different sites. So for example a patient might have extrinsic compression of the distal trachea with endobronchial obstruction of the left mainstem bronchus. Each anatomic location was classified in regards to the type of obstruction as either intrinsic (i.e. endobronchial), extrinsic, or mixed. For a given anatomic location these three categories are mutually exclusive and completely exhaustive. Since the analysis is on a per patient basis, the type of obstruction is listed as any intrinsic, any extrinsic, or any mixed disease, since a patient might have more than one site of obstruction. Thus, in the case of a patient with extrinsic compression of the distal trachea and endobronchial occlusion of the left mainstem, they were classified as extrinsic compression (value=1) and intrinsic obstruction (value=1) and no mixed disease (value=0). Note that the variable "any mixed" is still 0 for this patient, since mixed disease has a specific meaning distinct from intrinsic and extrinsic disease. Of the 1,115 patients, 725 (65%) had obstruction at one location only, 227 (20%) had two locations, 119 (11%) had three locations, 35 (3%) had four locations, and 8 (1%) had obstruction at five locations. In terms of the type(s) of obstruction present, 1,041 (93%) patients had only one type of obstruction, 68 (6%) had two types of obstruction, and 6 (1%) had all three types of obstruction present. The same system applied to interventions. A patient could have more than one type of stent placed, either in the

*Online supplements are not copyedited prior to posting.*

same location or other locations, so ablative therapies and stent strategies are listed as “any” use of that type of technology.

### Stent Classification

Stent use was classified on a per patient basis. Because patients could have more than one type of stent, the variables listed under stent type are not mutually exclusive. The domains for classifying a particular stent were material (silicone vs. metal) and shape (Y –shaped vs. simple tube). Some patients had metal Y-shaped stents that are not commercially available in the U.S., so Y-shaped is not necessarily synonymous with silicone material. For a particular patient, if they had more than one stent placed, they could end up with multiple variables being checked as a yes. For example, if a patient had only a Dumon Y-stent placed, this would be considered a silicone stent and a Y-stent. If a patient had only an Aero expandable metal stent placed this would be considered a metal stent and a tube stent. If a patient had both a Dumon Y-stent and an Aero stent placed then they would have a Y-stent, a tube stent, a silicone stent, and a metal stent.

### **Analysis**

#### Regression to the Mean

Regression to the mean occurs when there is random error associated with observed values and repeated measurements are made on the same unit of study.<sup>1</sup> The effect of regression to the mean is more pronounced with increasing measurement error and when follow-up measurements are only examined for a selected subset depending upon their baseline measurements. In this study the decision to take follow-up measurements was not based upon baseline measurements so the latter consideration does not apply. However, measurement error is still present so regression to the mean remains a concern. Note that regression to the mean does not impact the observation that both dyspnea and utility improved following intervention. However, it is relevant when estimating the effects of other covariates on the outcomes of change in dyspnea ( $\Delta$ Borg) and change in utility ( $\Delta$ utility).

Different methods have been proposed to estimate the size of the effect of regression to the mean and to adjust for this effect.<sup>1-3</sup> One method is to use analysis of covariance and adjust each subject’s follow-up measurement according to their baseline measurement.<sup>1</sup> For  $\Delta$ Borg, we included the baseline Borg score in the multivariate model to adjust for regression to the mean.

In the predictive analysis for  $\Delta$ utility we chose to construct multivariable models without using baseline utility as a covariate since we were most interested in the relationship between measures that are clinically available and subsequent changes in HRQOL. Physicians can easily assess baseline dyspnea but

*Online supplements are not copyedited prior to posting.*

utility is not a measure usually available. In addition, baseline dyspnea and baseline utility were highly correlated ( $p=0.59$ ,  $p<0.0001$ ) so including both would be problematic. We subsequently performed an additional analysis using backward selection with baseline utility as a candidate variable. When we included baseline utility in the multivariate predictive model for  $\Delta$ utility, the model only retained baseline utility (e-table 3). These findings suggest that while there was a significant improvement in utility associated with therapeutic bronchoscopy, the relationship between specific covariates and  $\Delta$ utility in the predictive model may be confounded by regression to the mean to some degree. This is complicated by the fact that dyspnea and utility are highly correlated, making interpretation difficult for the predictive model.

For the explanatory model of  $\Delta$ utility, we used  $\Delta$ Borg rather than baseline Borg as a covariate, since we believe it is improvements in dyspnea that are likely to drive subsequent improvement in utility. We found absence of tracheal involvement, absence of bronchus intermedius involvement, and greater improvements in dyspnea were associated with greater improvements in utility (e-table 3). When we included baseline utility there was little change in the model, suggesting that even after accounting for regression to the mean these variables were associated with  $\Delta$ utility.

## Discussion

### Limitations of Generic HRQOL Instruments

HRQOL can be measured with either disease specific instruments, such as the FACT-L, or with generic instruments, such as the SF36. Each instrument has its own strengths and weaknesses. Disease specific instruments are more sensitive and are suitable for assessing impact of treatment, but they are not suitable if different treatment alternatives involve different types of risks and trade-offs (e.g. risk of bleeding vs. photosensitivity). Similarly, disease specific HRQOL instruments are not useful for comparing the benefits of treatment with the risks of complications if the nature of the outcomes being compared is different (i.e. dyspnea relief vs. death).<sup>4</sup> As such they are less useful when it comes to making clinical decisions that require trade-offs between HRQOL and complications.

Generic HRQOL instruments, while less sensitive, can be used for diverse groups of diseases and can be classified as either profile or single index measures. Single index measures, such as the SF-6D,<sup>5</sup> generate measures of utility and range from 0 to 1, with zero being death and 1 being perfect health. They are necessary for calculating QALYs and as such are essential for cost-effectiveness analysis. Quality adjusted survival can be thought of as the area under the curve with utility plotted on the vertical axis and time plotted on the horizontal axis. During recent years, the QALY has been recognized as the most important indicator of the effectiveness of health care interventions, as reflected by the position

*Online supplements are not copyedited prior to posting.*

statements and guidelines of the National Institute of Health and Clinical Excellence (NICE)<sup>6</sup>, the Agency for Health Care Research and Quality, and the U.S. Public Health Service.<sup>7-9</sup> Measuring utility pre and post procedure allows physicians to more realistically judge the trade-offs involved when assessing interventions, particularly when those interventions are palliative in nature, because it facilitates comparisons between improvements in HRQOL and the potential downside risk of shorter duration of life (see the online supplement for additional information on generic instruments).

The limitation of using generic instruments is that they can be insensitive. As such, using utility (or QALYs) as the sole outcome is not advisable when investigating a clinical problem. However, utility should be one of several metrics used to assess outcomes, depending on what the question is. If you are asking did the intervention achieve the objective (i.e. clinical efficacy study), you probably want to measure multiple dimensions, one of which might be QALYs, but the primary outcome would be more specific to the intervention – e.g. something like technical success defined as reestablishing luminal patency or dyspnea relief. Then you can infer whether the treatment “works” for that problem. When we look at utility, the question being asked is different. It says, in this particular population of patients, with the given clinical context, how much impact did relief of airway obstruction and the resultant change in dyspnea have on HRQOL? We are also in a better position to answer the question, given the risk of death involved, is this worth it. The answer is conditional on many other factors that impact HRQOL. This relates to the difference between clinical efficacy and clinical effectiveness and comparative effectiveness. In some cases you might totally eliminate a real problem (clinical efficacy) and yet have no or little impact on overall utility. Using utility as one of several outcome measures allows us to gain insights into clinical effectiveness because it helps identify factors that do not impact technical success of the procedure but do impact the global health of the patient and thereby modify the effect of the intervention on utility. This is particularly relevant for palliative interventions.

*Online supplements are not copyedited prior to posting.*

**e-Table 1. Comparison of Dyspnea Subset vs Other Patients at the Same Centers**

|                                              | <b>Dyspnea Subset<br/>(n=187)</b> | <b>Patients at the same centers not in dyspnea subset<br/>(n=291)</b> | <b>p-value vs. Dyspnea Subset</b> |
|----------------------------------------------|-----------------------------------|-----------------------------------------------------------------------|-----------------------------------|
| Age, years (mean ± std)                      | 63.9 ± 13.2                       | 62.3 ± 14.4                                                           | 0.25 <sup>†</sup>                 |
| Race White, n (%)                            |                                   |                                                                       |                                   |
| Nonwhite                                     | 36 (19)                           | 51 (18)                                                               |                                   |
| White                                        | 151 (81)                          | 240 (82)                                                              | 0.63                              |
| Inpatient, n (%)                             |                                   |                                                                       |                                   |
| No                                           | 143 (76)                          | 165 (57)                                                              |                                   |
| Yes                                          | 44 (24)                           | 126 (43)                                                              | <0.001                            |
| Urgency of the procedure, n (%)              |                                   |                                                                       |                                   |
| Elective                                     | 153 (82)                          | 210 (72)                                                              |                                   |
| Emergent                                     | 3 (2)                             | 21 (7)                                                                |                                   |
| Urgent                                       | 31 (17)                           | 60 (21)                                                               | 0.006                             |
| Zubrod score, mean (std)                     |                                   |                                                                       |                                   |
| ≤ 1                                          | 85 (45)                           | 112 (38)                                                              |                                   |
| >1                                           | 102 (55)                          | 179 (62)                                                              | 0.15                              |
| ASA score, n (%)                             |                                   |                                                                       |                                   |
| ≤ 3                                          | 148 (79)                          | 212 (73)                                                              |                                   |
| >3                                           | 39 (21)                           | 79 (27)                                                               | 0.13                              |
| Therapeutic bronchoscopy, n (%)              |                                   |                                                                       |                                   |
| First therapeutic bronchoscopy               | 126 (67)                          | 211 (73)                                                              |                                   |
| Redo bronchoscopy (2 <sup>nd</sup> or later) | 61 (33)                           | 80 (27)                                                               | 0.26                              |
| <b>Comorbidities</b>                         |                                   |                                                                       |                                   |
| Asthma, n (%)                                |                                   |                                                                       |                                   |
| No                                           | 177 (95)                          | 281 (97)                                                              |                                   |
| Yes                                          | 10 (5)                            | 10 (3)                                                                | 0.35                              |
| COPD, n (%)                                  |                                   |                                                                       |                                   |
| No                                           | 136 (73)                          | 200 (69)                                                              |                                   |
| Yes                                          | 51 (27)                           | 91 (31)                                                               | 0.36                              |
| Cardiac vascular disease, n (%)              |                                   |                                                                       |                                   |
| No                                           | 100 (53)                          | 172 (59)                                                              |                                   |
| Yes                                          | 87 (47)                           | 119 (41)                                                              | 0.26                              |
| Diabetes, n (%)                              |                                   |                                                                       |                                   |
| No                                           | 166 (89)                          | 259 (89)                                                              |                                   |

*Online supplements are not copyedited prior to posting.*

|                                          |          |            |      |
|------------------------------------------|----------|------------|------|
| Yes                                      | 21 (11)  | 32 (11)    | 1.0  |
| GERD, n (%)                              |          |            |      |
| No                                       | 182 (97) | 285 (98)   |      |
| Yes                                      | 5 (3)    | 6 (2)      | 0.76 |
| Hematologic malignancy, n (%)            |          |            |      |
| No                                       | 184 (98) | 290 (99.7) |      |
| Yes                                      | 3 (2)    | 1 (0.3)    | 0.31 |
| Second primary solid tumor, n (%)        |          |            |      |
| No                                       | 183 (98) | 288 (99)   |      |
| Yes                                      | 4 (2)    | 3 (1)      | 0.44 |
| Renal failure creatinine >2 or HD, n (%) |          |            |      |
| No                                       | 183 (98) | 287 (99)   |      |
| Yes                                      | 4 (2)    | 4 (1)      | 0.72 |
| Bleeding risk high meds, n (%)           |          |            |      |
| No                                       | 186 (99) | 281 (97)   |      |
| Yes                                      | 1 (1)    | 10 (3)     | 0.06 |
| <b>Tobacco Use</b>                       |          |            |      |
| Never user                               | 50 (27)  | 75 (26)    |      |
| Current or prior use                     | 137 (73) | 216 (74)   | 0.83 |
| <b>Cancer Related</b>                    |          |            |      |
| Time from cancer diagnosis               |          |            |      |
| ≤ 75 days                                | 59 (32)  | 108 (37)   |      |
| >75 days                                 | 128 (68) | 183 (63)   | 0.24 |
| Primary lung cancer, n (%)               |          |            |      |
| No                                       | 76 (41)  | 105 (36)   |      |
| Yes                                      | 111 (59) | 186 (64)   | 0.34 |
| <b>Location of Disease</b>               |          |            |      |
| Trachea, n (%)                           |          |            |      |
| No                                       | 154 (82) | 215 (74)   |      |
| Yes                                      | 33 (18)  | 76 (26)    | 0.03 |
| Left main, n (%)                         |          |            |      |
| No                                       | 114(61)  | 180 (62)   |      |
| Yes                                      | 73 (39)  | 111 (38)   | 0.85 |
| Right main, n (%)                        |          |            |      |
| No                                       | 126 (67) | 192 (66)   |      |
| Yes                                      | 61 (33)  | 99 (34)    | 0.77 |
| Bronchus intermedius, n (%)              |          |            |      |
| No                                       | 118 (63) | 169 (58)   |      |
| Yes                                      | 69 (37)  | 122 (42)   | 0.29 |
| Lobar, n (%)                             |          |            |      |
| No                                       | 116 (62) | 194 (67)   |      |
| Yes                                      | 71 (38)  | 97 (33)    | 0.33 |

*Online supplements are not copyedited prior to posting.*

|                                      |           |          |        |
|--------------------------------------|-----------|----------|--------|
| Any tracheoesophageal fistula, n (%) |           |          |        |
| No                                   | 187 (100) | 286 (98) |        |
| Yes                                  | 0 (0)     | 5 (2)    | 0.16   |
| <b>Type of Obstruction</b>           |           |          |        |
| Any intrinsic, n (%)                 |           |          |        |
| No                                   | 58 (31)   | 110 (38) |        |
| Yes                                  | 129 (69)  | 181 (62) | 0.14   |
| Any extrinsic, n (%)                 |           |          |        |
| No                                   | 166 (89)  | 241 (83) |        |
| Yes                                  | 21 (11)   | 50 (17)  | 0.09   |
| Any mixed, n (%)                     |           |          |        |
| No                                   | 137 (73)  | 205 (70) |        |
| Yes                                  | 50 (27)   | 86 (30)  | 0.53   |
| <b>Procedural Variables</b>          |           |          |        |
| Anesthesia, n (%)                    |           |          |        |
| Moderate sedation                    | 45 (24)   | 69 (24)  |        |
| Deep or general                      | 142 (76)  | 222 (76) | 1.0    |
| Paralysis, n (%)                     |           |          |        |
| No                                   | 76 (41)   | 110 (38) |        |
| Yes                                  | 111 (59)  | 181 (62) | 0.57   |
| Type of ventilation, n (%)           |           |          |        |
| Volume cycled                        | 58 (31)   | 79 (27)  |        |
| Jet                                  | 80 (43)   | 135 (46) |        |
| Spontaneous                          | 49 (26)   | 77 (26)  | 0.63   |
| Type of bronchoscopy                 |           |          |        |
| Flexible                             | 66 (35)   | 153 (53) |        |
| Rigid                                | 121 (65)  | 138 (47) | <0.001 |
| Any laser used                       |           |          |        |
| No                                   | 149 (80)  | 261 (90) |        |
| Yes                                  | 38 (20)   | 30 (10)  | 0.003  |
| Any electrocautery used              |           |          |        |
| No                                   | 143 (76)  | 238 (82) |        |
| Yes                                  | 44 (24)   | 53 (18)  | 0.16   |
| Any APC used                         |           |          |        |
| No                                   | 102 (55)  | 169 (58) |        |
| Yes                                  | 85 (45)   | 122 (42) | 0.45   |
| Any cryotherapy used                 |           |          |        |
| No                                   | 151 (81)  | 250 (86) |        |
| Yes                                  | 36 (19)   | 14 (14)  | 0.16   |
| Any dilation done                    |           |          |        |
| No                                   | 150 (80)  | 232 (80) |        |
| Yes                                  | 37 (20)   | 59 (20)  | 1.0    |

### Stent

Stent placed

*Online supplements are not copyedited prior to posting.*

|                |          |          |      |
|----------------|----------|----------|------|
| No             | 128 (68) | 184 (63) |      |
| Yes            | 59 (32)  | 107 (37) | 0.28 |
| Metal stent    |          |          |      |
| No             | 143 (76) | 203 (70) |      |
| Yes            | 44 (24)  | 88 (30)  | 0.12 |
| Silicone stent |          |          |      |
| No             | 178 (95) | 282 (97) |      |
| Yes            | 9 (5)    | 9 (3)    | 0.34 |
| Tube stent     |          |          |      |
| No             | 134 (72) | 195 (67) |      |
| Yes            | 53 (28)  | 96 (33)  | 0.31 |
| Y stent        |          |          |      |
| No             | 180 (96) | 278 (96) |      |
| Yes            | 7 (4)    | 13 (4)   | 0.82 |

† Two-sample t-test; Fisher's exact test for all other categorical comparisons.

*Online supplements are not copyedited prior to posting.*



**e-Table 2. Patient and Clinic Characteristics by Improved Borg Score, Responder Analysis**

|                                              | <b>Borg not improved (Post – Pre &gt; -1) (N=97)</b> | <b>Borg Improved (Post – Pre ≤ -1) (N=90)</b> | <b>P-value</b>       | <b>Multivariate Odds Ratio (95% CI)‡</b> | <b>P-value</b> |
|----------------------------------------------|------------------------------------------------------|-----------------------------------------------|----------------------|------------------------------------------|----------------|
| Baseline Borg (mean ± std)                   | 2.1 ± 1.6                                            | 4.7 ± 2.1                                     | <0.0001 <sup>δ</sup> | 2.40 (1.83-3.14)                         | <0.0001        |
| Age, years (mean)                            | 64.6                                                 | 62.9                                          | 0.39†                |                                          |                |
| Race, n (%)                                  |                                                      |                                               |                      |                                          |                |
| Nonwhite                                     | 21(58.3)                                             | 15(41.7)                                      |                      |                                          |                |
| White                                        | 76(50.3)                                             | 75(49.7)                                      | 0.39                 |                                          |                |
| Inpatient, n (%)                             |                                                      |                                               |                      |                                          |                |
| No                                           | 78(54.5)                                             | 65(45.5)                                      |                      |                                          |                |
| Yes                                          | 19(43.2)                                             | 25(56.8)                                      | 0.19                 |                                          |                |
| Urgency of the procedure, n (%)              |                                                      |                                               |                      |                                          |                |
| Elective                                     | 84(54.9)                                             | 69(45.1)                                      |                      |                                          |                |
| Emergent                                     | .(0)                                                 | 3(100)                                        |                      |                                          |                |
| Urgent                                       | 13(41.9)                                             | 18(58.1)                                      | 0.09                 |                                          |                |
| Zubrod score, n (%)                          |                                                      |                                               |                      |                                          |                |
| ≤ 1                                          | 48(56.5)                                             | 37(43.5)                                      |                      |                                          |                |
| > 1                                          | 49(48)                                               | 53(52)                                        | 0.25                 |                                          |                |
| ASA score, n (%)                             |                                                      |                                               |                      |                                          |                |
| ≤ 3                                          | 79(53.4)                                             | 69(46.6)                                      |                      |                                          |                |
| > 3                                          | 18(46.2)                                             | 21(53.8)                                      | 0.42                 |                                          |                |
| Therapeutic bronchoscopy, n (%)              |                                                      |                                               |                      |                                          |                |
| First therapeutic bronchoscopy               | 58(46.0)                                             | 68(54.0)                                      |                      |                                          |                |
| Redo bronchoscopy (2 <sup>nd</sup> or later) | 39(63.9)                                             | 22(36.1)                                      | 0.03                 |                                          |                |
| <b>Comorbidities</b>                         |                                                      |                                               |                      |                                          |                |
| Asthma, n (%)                                |                                                      |                                               |                      |                                          |                |
| No                                           | 94(53.1)                                             | 83(46.9)                                      |                      |                                          |                |
| Yes                                          | 3(30)                                                | 7(70)                                         | 0.20*                |                                          |                |
| COPD, n (%)                                  |                                                      |                                               |                      |                                          |                |
| No                                           | 72(52.9)                                             | 64(47.1)                                      |                      |                                          |                |
| Yes                                          | 25(49)                                               | 26(51)                                        | 0.63                 |                                          |                |
| Cardiac vascular disease, n (%)              |                                                      |                                               |                      |                                          |                |
| No                                           | 51(51)                                               | 49(49)                                        |                      |                                          |                |
| Yes                                          | 46(52.9)                                             | 41(47.1)                                      | 0.80                 |                                          |                |
| Diabetes, n (%)                              |                                                      |                                               |                      |                                          |                |
| No                                           | 87(52.4)                                             | 79(47.6)                                      |                      |                                          |                |
| Yes                                          | 10(47.6)                                             | 11(52.4)                                      | 0.68                 |                                          |                |
| GERD, n (%)                                  |                                                      |                                               |                      |                                          |                |

*Online supplements are not copyedited prior to posting.*

|                                          |          |          |       |                  |      |
|------------------------------------------|----------|----------|-------|------------------|------|
| No                                       | 96(52.7) | 86(47.3) |       |                  |      |
| Yes                                      | 1(20)    | 4(80)    | 0.20* |                  |      |
| Hematologic malignancy, n (%)            |          |          |       |                  |      |
| No                                       | 96(52.2) | 88(47.8) |       |                  |      |
| Yes                                      | 1(33.3)  | 2(66.7)  | 0.60* |                  |      |
| Second primary solid tumor, n (%)        |          |          |       |                  |      |
| No                                       | 95(51.9) | 88(48.1) |       |                  |      |
| Yes                                      | 2(50)    | 2(50)    | 1.0*  |                  |      |
| Renal failure creatinine >2 or HD, n (%) |          |          |       |                  |      |
| No                                       | 94(51.4) | 89(48.6) |       |                  |      |
| Yes                                      | 3(75)    | 1(25)    | 0.62* |                  |      |
| Bleeding risk high meds, n (%)           |          |          |       |                  |      |
| No                                       | 96(51.6) | 90(48.4) |       |                  |      |
| Yes                                      | 1(100)   | 0(0)     | 1.0*  |                  |      |
| <b>Tobacco Use</b>                       |          |          |       |                  |      |
| Never user                               | 22(44)   | 28(56)   |       | (reference)      |      |
| Current or prior use                     | 75(54.7) | 62(45.3) | 0.19  | 0.38 (0.16-0.91) | 0.03 |
| <b>Cancer Related</b>                    |          |          |       |                  |      |
| Time from cancer diagnosis               |          |          |       |                  |      |
| ≤ 75 days                                | 26(44.1) | 33(55.9) |       |                  |      |
| >75 days                                 | 71(55.5) | 57(44.5) | 0.15  |                  |      |
| Primary lung cancer, n (%)               |          |          |       |                  |      |
| No                                       | 45(59.2) | 31(40.8) |       |                  |      |
| Yes                                      | 52(46.8) | 59(53.2) | 0.10  |                  |      |
| <b>Location of Disease</b>               |          |          |       |                  |      |
| Trachea, n (%)                           |          |          |       |                  |      |
| No                                       | 82(53.2) | 72(46.8) |       |                  |      |
| Yes                                      | 15(45.5) | 18(54.5) | 0.42  |                  |      |
| Left main, n (%)                         |          |          |       |                  |      |
| No                                       | 67(58.8) | 47(41.2) |       |                  |      |
| Yes                                      | 30(41.1) | 43(58.9) | 0.02  |                  |      |
| Right main, n (%)                        |          |          |       |                  |      |
| No                                       | 69(54.8) | 57(45.2) |       |                  |      |
| Yes                                      | 28(45.9) | 33(54.1) | 0.25  |                  |      |
| Bronchus intermedius, n (%)              |          |          |       |                  |      |
| No                                       | 56(47.5) | 62(52.5) |       |                  |      |
| Yes                                      | 41(59.4) | 28(40.6) | 0.11  |                  |      |
| Lobar, n (%)                             |          |          |       |                  |      |
| No                                       | 58(50)   | 58(50)   |       |                  |      |
| Yes                                      | 39(54.9) | 32(45.1) | 0.51  |                  |      |
| Any tracheoesophageal fistula, n (%)     |          |          |       |                  |      |

*Online supplements are not copyedited prior to posting.*

|                            |          |          |      |
|----------------------------|----------|----------|------|
| No                         | 97(51.9) | 90(48.1) |      |
| Yes                        | 0(0)     | 0(0)     | NA   |
| <b>Type of Obstruction</b> |          |          |      |
| Any intrinsic, n (%)       |          |          |      |
| No                         | 30(51.7) | 28(48.3) |      |
| Yes                        | 67(51.9) | 62(48.1) | 0.98 |
| Any extrinsic, n (%)       |          |          |      |
| No                         | 84(50.6) | 82(49.4) |      |
| Yes                        | 13(61.9) | 8(38.1)  | 0.33 |
| Any mixed, n (%)           |          |          |      |
| No                         | 74(54)   | 63(46)   |      |
| Yes                        | 23(46)   | 27(54)   | 0.33 |
| Anesthesia, n (%)          |          |          |      |
| Moderate sedation          | 22(48.9) | 23(51.1) |      |
| General anesthesia         | 75(52.8) | 67(47.2) | 0.65 |
| Paralysis, n (%)           |          |          |      |
| No                         | 36(47.4) | 40(52.6) |      |
| Yes                        | 61(55)   | 50(45)   | 0.31 |
| Type of ventilation, n (%) |          |          |      |
| Volume cycled              | 30(51.7) | 28(48.3) |      |
| Jet                        | 43(53.8) | 37(46.3) |      |
| Spontaneous                | 24(49)   | 25(51)   | 0.87 |
| Type of bronchoscopy       |          |          |      |
| Flexible                   | 32(48.5) | 34(51.5) |      |
| Rigid                      | 65(53.7) | 56(46.3) | 0.49 |
| Any laser used             |          |          |      |
| No                         | 79(53)   | 70(47)   |      |
| Yes                        | 18(47.4) | 20(52.6) | 0.53 |
| Any electrocautery used    |          |          |      |
| No                         | 72(50.3) | 71(49.7) |      |
| Yes                        | 25(56.8) | 19(43.2) | 0.45 |
| Any APC used               |          |          |      |
| No                         | 49(48)   | 53(52)   |      |
| Yes                        | 48(56.5) | 37(43.5) | 0.25 |
| Any cryotherapy used       |          |          |      |
| No                         | 79(52.3) | 72(47.7) |      |
| Yes                        | 18(50)   | 18(50)   | 0.80 |
| Any dilation done          |          |          |      |
| No                         | 82(54.7) | 68(45.3) |      |
| Yes                        | 15(40.5) | 22(59.5) | 0.12 |
| <b>Stent</b>               |          |          |      |
| Stent placed               |          |          |      |
| No                         | 69(53.9) | 59(46.1) |      |
| Yes                        | 28(47.5) | 31(52.5) | 0.41 |

*Online supplements are not copyedited prior to posting.*



|                |          |          |       |  |
|----------------|----------|----------|-------|--|
| Metal stent    |          |          |       |  |
| No             | 73(51)   | 70(49)   |       |  |
| Yes            | 24(54.5) | 20(45.5) | 0.68  |  |
| Silicone stent |          |          |       |  |
| No             | 94(52.8) | 84(47.2) |       |  |
| Yes            | 3(33.3)  | 6(66.7)  | 0.31* |  |
| Tube stent     |          |          |       |  |
| No             | 70(52.2) | 64(47.8) |       |  |
| Yes            | 27(50.9) | 26(49.1) | 0.87  |  |
| Y stent        |          |          |       |  |
| No             | 95(52.8) | 85(47.2) |       |  |
| Yes            | 2(28.6)  | 5(71.4)  | 0.21  |  |

HD: Hemodialysis; APC: argon plasma coagulation; CI: Confidence interval; † Two-sample t-test.  
 \*Fisher's exact test. ‡ Firth's Penalized Likelihood Approach utilized for rare events. δ Wilcoxon-Mann-Whitney two-sample test.

*Online supplements are not copyedited prior to posting.*

**e-Table 3. Multivariate models for Difference in Utility (Post – Pre):**

|                                                        | <b>Coefficient estimate (Error)</b> | <b>P-value</b> |
|--------------------------------------------------------|-------------------------------------|----------------|
| <b>Predictive Model Not Including Baseline Utility</b> |                                     |                |
| Baseline Borg                                          | 0.010 (0.003)                       | 0.005          |
| Lobar obstruction yes vs. no                           | -0.036 (0.016)                      | 0.02           |
| <b>Predictive Model Including Baseline Utility</b>     |                                     |                |
| Baseline utility                                       | -0.30 (0.058)                       | <0.001         |
| <b>Explanatory Model Not Using Baseline Utility</b>    |                                     |                |
| Δ Borg Score                                           | -0.024 (0.003)                      | <0.001         |
| Tracheal involvement yes vs. no                        | -0.050 (0.019)                      | 0.01           |
| Bronchus intermedius obstruction yes vs. no            | -0.032 (0.015)                      | 0.03           |
| <b>Explanatory Model Including Baseline Utility</b>    |                                     |                |
| Δ Borg Score                                           | -0.020 (0.003)                      | <0.001         |
| Tracheal obstruction yes vs. no                        | -0.041 (0.019)                      | .03            |
| Bronchus intermedius obstruction yes vs. no            | -0.030 (0.015)                      | 0.04           |
| Baseline utility                                       | -0.18 (0.058)                       | 0.002          |

*Online supplements are not copyedited prior to posting.*

**e-Table 4. Patient and Clinic Characteristics by Improved Utility, Responder Analysis**

|                                                 | <b>Non-<br/>Responders<br/>(Post – Pre<br/>Utility &lt;<br/>0.033)</b> | <b>Responders<br/>(Post – Pre<br/>Utility ≥<br/>0.033)</b> | <b>P-<br/>value</b> | <b>Multivariate<br/>Odds Ratio<br/>(95% CI)‡</b> | <b>P-<br/>value</b> |
|-------------------------------------------------|------------------------------------------------------------------------|------------------------------------------------------------|---------------------|--------------------------------------------------|---------------------|
| Baseline Borg (mean ± std)                      | 3.1 ± 2.1                                                              | 3.6 ± 2.5                                                  | 0.15†               |                                                  |                     |
| Post - Pre Borg difference<br>(mean ± std)      | -0.5 ± 1.9                                                             | -1.7 ± 2.1                                                 | 0.0002†             |                                                  |                     |
| Age, years (mean ± std)                         | 62.6 ± 12.8                                                            | 63.1 ± 14.7                                                | 0.80†               |                                                  |                     |
| Race White, n (%)                               |                                                                        |                                                            |                     |                                                  |                     |
| Nonwhite                                        | 21(65.6)                                                               | 11(34.4)                                                   |                     |                                                  |                     |
| White                                           | 86(57)                                                                 | 65(43)                                                     | 0.36                |                                                  |                     |
| Inpatient, n (%)                                |                                                                        |                                                            |                     |                                                  |                     |
| No                                              | 87(61.3)                                                               | 55(38.7)                                                   |                     |                                                  |                     |
| Yes                                             | 20(48.8)                                                               | 21(51.2)                                                   | 0.15                |                                                  |                     |
| Urgency of the procedure, n<br>(%)              |                                                                        |                                                            |                     |                                                  |                     |
| Elective                                        | 91(60.7)                                                               | 59(39.3)                                                   |                     |                                                  |                     |
| Emergent                                        | 1(33.3)                                                                | 2(66.7)                                                    |                     |                                                  |                     |
| Urgent                                          | 15(50)                                                                 | 15(50)                                                     | 0.37                |                                                  |                     |
| Zubrod score, mean (std)                        |                                                                        |                                                            |                     |                                                  |                     |
| ≤ 1                                             | 59(67)                                                                 | 29(33)                                                     |                     | (reference)                                      |                     |
| >1                                              | 48(50.5)                                                               | 47(49.5)                                                   | 0.023               | 2.62 (1.35-<br>5.06)                             | 0.004               |
| ASA score, n (%)                                |                                                                        |                                                            |                     |                                                  |                     |
| ≤ 3                                             | 91(61.5)                                                               | 57(38.5)                                                   |                     |                                                  |                     |
| >3                                              | 16(45.7)                                                               | 19(54.3)                                                   | 0.09                |                                                  |                     |
| Therapeutic bronchoscopy, n<br>(%)              |                                                                        |                                                            |                     |                                                  |                     |
| First therapeutic<br>bronchoscopy               | 76(60.8)                                                               | 49(39.2)                                                   |                     |                                                  |                     |
| Redo bronchoscopy (2 <sup>nd</sup><br>or later) | 31(53.4)                                                               | 27(46.6)                                                   | 0.35                |                                                  |                     |
| <b>Comorbidities</b>                            |                                                                        |                                                            |                     |                                                  |                     |
| Asthma, n (%)                                   |                                                                        |                                                            |                     |                                                  |                     |
| No                                              | 103(59.2)                                                              | 71(40.8)                                                   |                     |                                                  |                     |
| Yes                                             | 4(44.4)                                                                | 5(55.6)                                                    | 0.49*               |                                                  |                     |
| COPD, n (%)                                     |                                                                        |                                                            |                     |                                                  |                     |
| No                                              | 82(62.6)                                                               | 49(37.4)                                                   |                     |                                                  |                     |
| Yes                                             | 25(48.1)                                                               | 27(51.9)                                                   | 0.07                |                                                  |                     |
| Cardiac vascular disease, n<br>(%)              |                                                                        |                                                            |                     |                                                  |                     |
| No                                              | 56(57.1)                                                               | 42(42.9)                                                   |                     |                                                  |                     |
| Yes                                             | 51(60)                                                                 | 34(40)                                                     | 0.69                |                                                  |                     |
| Diabetes, n (%)                                 |                                                                        |                                                            |                     |                                                  |                     |

*Online supplements are not copyedited prior to posting.*

|                                          |           |          |       |
|------------------------------------------|-----------|----------|-------|
| No                                       | 91(55.8)  | 72(44.2) |       |
| Yes                                      | 16(80)    | 4(20)    | 0.05* |
| GERD, n (%)                              |           |          |       |
| No                                       | 103(57.9) | 75(42.1) |       |
| Yes                                      | 4(80)     | 1(20)    | 0.40* |
| Hematologic malignancy, n (%)            |           |          |       |
| No                                       | 106(58.6) | 75(41.4) |       |
| Yes                                      | 1(50)     | 1(50)    | 1.0*  |
| Second primary solid tumor, n (%)        |           |          |       |
| No                                       | 104(57.8) | 76(42.2) |       |
| Yes                                      | 3(100)    | 0(0)     | 0.27* |
| Renal failure creatinine >2 or HD, n (%) |           |          |       |
| No                                       | 106(59.2) | 73(40.8) |       |
| Yes                                      | 1(25)     | 3(75)    | 0.31* |
| Bleeding risk high meds, n (%)           |           |          |       |
| No                                       | 107(58.5) | 76(41.5) |       |
| Yes                                      | 0(0)      | 0(0)     | NA    |
| <b>Tobacco Use</b>                       |           |          |       |
| Never user                               | 31(59.6)  | 21(40.4) |       |
| Current or prior use                     | 76(58)    | 55(42)   | 0.84  |
| <b>Cancer Related</b>                    |           |          |       |
| Time from cancer diagnosis               |           |          |       |
| ≤ 75 days                                | 34(58.6)  | 24(41.4) |       |
| >75 days                                 | 73(58.4)  | 52(41.6) | 0.98  |
| Primary lung cancer, n (%)               |           |          |       |
| No                                       | 43(59.7)  | 29(40.3) |       |
| Yes                                      | 64(57.7)  | 47(42.3) | 0.78  |
| <b>Location of Disease</b>               |           |          |       |
| Trachea, n (%)                           |           |          |       |
| No                                       | 85(56.3)  | 66(43.7) |       |
| Yes                                      | 22(68.8)  | 10(31.3) | 0.19  |
| Left main, n (%)                         |           |          |       |
| No                                       | 73(63.5)  | 42(36.5) |       |
| Yes                                      | 34(50)    | 34(50)   | 0.07  |
| Right main, n (%)                        |           |          |       |
| No                                       | 71(56.8)  | 54(43.2) |       |
| Yes                                      | 36(62.1)  | 22(37.9) | 0.50  |
| Bronchus intermedius, n (%)              |           |          |       |
| No                                       | 68(58.6)  | 48(41.4) |       |
| Yes                                      | 39(58.2)  | 28(41.8) | 0.96  |
| Lobar, n (%)                             |           |          |       |
| No                                       | 60(53.1)  | 53(46.9) |       |

*Online supplements are not copyedited prior to posting.*

|                                      |           |          |       |                  |       |
|--------------------------------------|-----------|----------|-------|------------------|-------|
| Yes                                  | 47(67.1)  | 23(32.9) | 0.06  |                  |       |
| Any tracheoesophageal fistula, n (%) |           |          |       |                  |       |
| No                                   | 107(58.5) | 76(41.5) |       |                  |       |
| Yes                                  | 0(0)      | 0(0)     | NA    |                  |       |
| <b>Type of Obstruction</b>           |           |          |       |                  |       |
| Any intrinsic, n (%)                 |           |          |       |                  |       |
| No                                   | 30(57.7)  | 22(42.3) |       |                  |       |
| Yes                                  | 77(58.8)  | 54(41.2) | 0.89  |                  |       |
| Any extrinsic, n (%)                 |           |          |       |                  |       |
| No                                   | 93(56.4)  | 72(43.6) |       | (reference)      |       |
| Yes                                  | 14(77.8)  | 4(22.2)  | 0.13* | 0.29 (0.09-0.97) | 0.045 |
| Any mixed, n (%)                     |           |          |       |                  |       |
| No                                   | 82(59.9)  | 55(40.1) |       |                  |       |
| Yes                                  | 25(54.3)  | 21(45.7) | 0.51  |                  |       |
| <b>Procedural Variables</b>          |           |          |       |                  |       |
| Anesthesia, n (%)                    |           |          |       |                  |       |
| Moderate sedation                    | 24(51.1)  | 23(48.9) |       |                  |       |
| Deep or general                      | 83(61)    | 53(39)   | 0.23  |                  |       |
| Paralysis, n (%)                     |           |          |       |                  |       |
| No                                   | 39(50)    | 39(50)   |       |                  |       |
| Yes                                  | 68(64.8)  | 37(35.2) | 0.05  |                  |       |
| Type of ventilation, n (%)           |           |          |       |                  |       |
| Volume cycled                        | 38(63.3)  | 22(36.7) |       |                  |       |
| Jet                                  | 44(60.3)  | 29(39.7) |       |                  |       |
| Spontaneous                          | 25(50)    | 25(50)   | 0.34  |                  |       |
| Type of bronchoscopy                 |           |          |       |                  |       |
| Flexible                             | 36(51.4)  | 34(48.6) |       | (reference)      |       |
| Rigid                                | 71(62.8)  | 42(37.2) | 0.13  | 0.44 (0.22-0.86) | 0.016 |
| Any laser used                       |           |          |       |                  |       |
| No                                   | 86(59.3)  | 59(40.7) |       |                  |       |
| Yes                                  | 21(55.3)  | 17(44.7) | 0.65  |                  |       |
| Any electrocautery used              |           |          |       |                  |       |
| No                                   | 81(56.6)  | 62(43.4) |       |                  |       |
| Yes                                  | 26(65)    | 14(35)   | 0.34  |                  |       |
| Any APC used                         |           |          |       |                  |       |
| No                                   | 58(58)    | 42(42)   |       |                  |       |
| Yes                                  | 49(59)    | 34(41)   | 0.89  |                  |       |
| Any cryotherapy used                 |           |          |       |                  |       |
| No                                   | 88(60.3)  | 58(39.7) |       |                  |       |
| Yes                                  | 19(51.4)  | 18(48.6) | 0.33  |                  |       |
| Any dilation done                    |           |          |       |                  |       |
| No                                   | 90(60)    | 60(40)   |       |                  |       |
| Yes                                  | 17(51.5)  | 16(48.5) | 0.37  |                  |       |

*Online supplements are not copyedited prior to posting.*



**Stent**

|                |           |          |       |  |
|----------------|-----------|----------|-------|--|
| Stent placed   |           |          |       |  |
| No             | 75(58.6)  | 53(41.4) |       |  |
| Yes            | 32(58.2)  | 23(41.8) | 0.96  |  |
| Metal stent    |           |          |       |  |
| No             | 87(60.8)  | 56(39.2) |       |  |
| Yes            | 20(50)    | 20(50)   | 0.22  |  |
| Silicone stent |           |          |       |  |
| No             | 100(57.5) | 74(42.5) |       |  |
| Yes            | 7(77.8)   | 2(22.2)  | 0.31* |  |
| Tube stent     |           |          |       |  |
| No             | 80(59.7)  | 54(40.3) |       |  |
| Yes            | 27(55.1)  | 22(44.9) | 0.58  |  |
| Y stent        |           |          |       |  |
| No             | 102(57.6) | 75(42.4) |       |  |
| Yes            | 5(83.3)   | 1(16.7)  | 0.40* |  |

† Two-sample t-test; \* Fisher's exact test.

**Acknowledgements:**

Institutional review board (IRB) approval was obtained by the primary site requesting the data (PI D.O. - MD Anderson Cancer Center). There was no personal health information (PHI) recorded in the database and all data was de-identified. All ages were given in years at the time of the procedure and unique identifiers for the registry were created that were separate from the patient's medical record number. Each institution maintained a separate secure file that listed medical record numbers and linked them to the registry unique identifier in case there were questions. However these files were never sent to the ACCP or AQUIRE hence this was de-identified data without any method of re-identifying patients.

Most institutional IRB's viewed this as de-identified data with the analysts not having access to the patient identifiers. If the people actually doing the research analysis on the data in the existing quality assurance database have no access to the patient identifiers, then they are doing research on de-identified data, and research on de-identified data is not human subjects research, therefore not reviewable by an IRB. Publication alone does not make a project human subjects research. They cited the following FAQ document regarding quality assurance (QA) vs research data:

<http://www.hhs.gov/ohrp/qualityfaq.html> for the collection of the data at these sites. Their ruling was that the primary site requesting the data for publication would need IRB approval. We verified with our own IRB at MD Anderson that this is indeed true. Primary IRB approval was obtained by the MD Anderson site,

*Online supplements are not copyedited prior to posting.*

which was the primary data request site. This was done under The University of Texas MD Anderson IRB committee 4, Protocol DR09-0101. This is similar to other registry data agreements like SEER, where the individual sites collecting the de-identified data do not provide IRB approval but the primary site(s) analyzing the data are required to do so.

However, each institution was asked to determine whether their local IRB required approval despite the de-identified QA data. A few institutions chose to have IRB approval even though the data was de-identified to facilitate collection and for their own research purposes. Here are the details for each site, their IRB ruling, and details of the IRB protocol numbers:

1. The University of Texas MD Anderson: IRB committee 4, Protocol DR09-0101. This was the primary site for the data request from AQuIRE.
2. Chicago Chest Center: QA initiative, IRB waiver for de-identified data collection, requiring primary site IRB approval.
3. Cleveland Clinic: IRB 09 – 315 PI: Gildea, Thomas Registry: AQuIRE-Bronchoscopy Registry-Quality Improvement Registry, Evaluation and Education (AQuIRE).
4. Duke University: Duke IRB Protocol 00027511 AQuIRE Project.
5. Foothills Medical Centre: QA initiative, IRB waiver for de-identified data collection, requiring primary site IRB approval.
6. Henry Ford Hospital: QA initiative, IRB waiver for de-identified data collection, requiring primary site IRB approval.
7. Johns Hopkins: QA initiative, IRB waiver for de-identified data collection, requiring primary site IRB approval.
8. Lyndon B. Johnson – The University of Texas Health Science Center Houston: Only one committee, Protocol HSC-MD-11-0377
9. Debakey Veteran Affairs Medical Center Baylor College of Medicine: Baylor College of Medicine IRB 2, H-26105.
10. Milton S. Hershey Medical Center: QA initiative, Pennsylvania State IRB approval number 00000823
11. Munroe Regional Medical Center: QA initiative, IRB waiver for de-identified data collection, requiring primary site IRB approval.
12. Papworth Hospital: Papworth Research Ethics Committee, Study approval number S01976
13. St. Elizabeth's Medical Center: QA initiative, IRB waiver for de-identified data collection, requiring primary site IRB approval.
14. University Hospital of Cincinnati Veteran Affairs Medical Center: IRB protocol 2013-0262. There is only one committee.
15. Yale-New Haven Hospital:

*Online supplements are not copyedited prior to posting.*

## References:

1. Barnett AG, van der Pols JC, Dobson AJ. Regression to the mean: what it is and how to deal with it. *Int J Epidemiol* 2005; 34:215-220
2. Chinn S, Heller RF. Some further results concerning regression to the mean. *Am J Epidemiol* 1981; 114:902-905
3. Yudkin PL, Stratton IM. How to deal with regression to the mean in intervention studies. *Lancet* 1996; 347:241-243
4. Ost DE, Jimenez CA, Lei X, et al. Quality-adjusted Survival Following Treatment of Malignant Pleural Effusions with Indwelling Pleural Catheters. *Chest* 2014
5. Brazier J, Roberts J, Deverill M. The estimation of a preference-based measure of health from the SF-36. *J Health Econ* 2002; 21:271-292
6. Rawlins MD, Culyer AJ. National Institute for Clinical Excellence and its value judgments. *BMJ* 2004; 329:224-227
7. Weinstein MC, Siegel JE, Gold MR, et al. Recommendations of the Panel on Cost-effectiveness in Health and Medicine. *JAMA* 1996; 276:1253-1258
8. Siegel JE, Torrance GW, Russell LB, et al. Guidelines for pharmacoeconomic studies. Recommendations from the panel on cost effectiveness in health and medicine. Panel on cost Effectiveness in Health and Medicine. *Pharmacoeconomics* 1997; 11:159-168
9. Atkins D, DiGuseppi CG. Broadening the evidence base for evidence-based guidelines. A research agenda based on the work of the U.S. Preventive Services Task Force. *Am J Prev Med* 1998; 14:335-344

*Online supplements are not copyedited prior to posting.*
